# Supplementary material for: Dual Immunoglobulin Domain-Containing Cell Adhesion Molecule Increases Early in Renal Tubular Cell Injury and Plays Anti-Inflammatory Role
Source: MDPI journal article supplement (doi:10.3390/cimb46030115), 2024-02-26
Supplement: s1 [file s1]

**Figure S1.** HK-2 cell viability test after H<sub>2</sub>O<sub>2</sub> and LPS treatment.

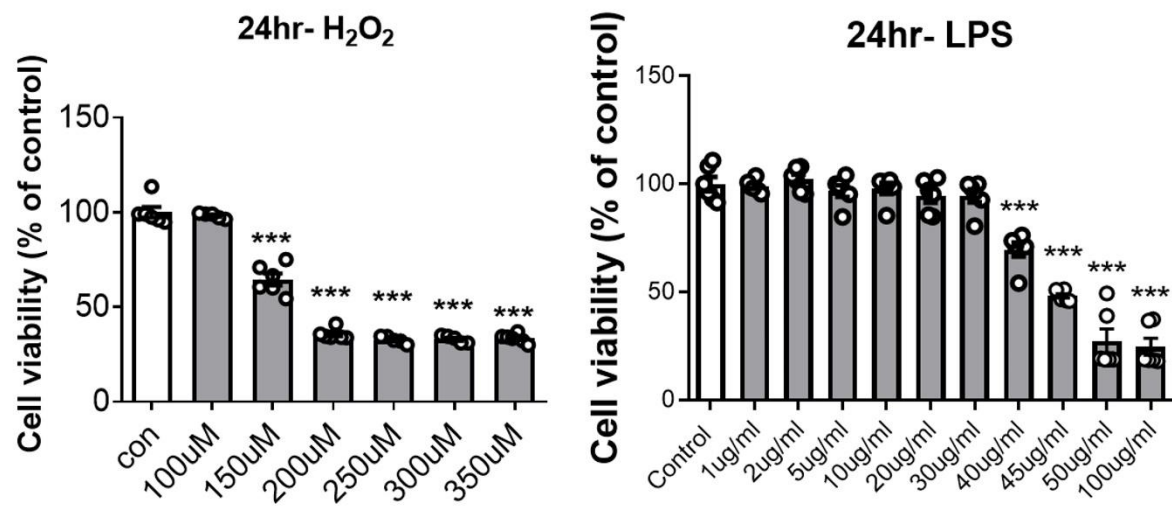

\*\*\*  $p < 0.001$  indicate statistical significance.

**Figure S2.** Association of DICAM expression and apoptosis in HK-2 cell injury.

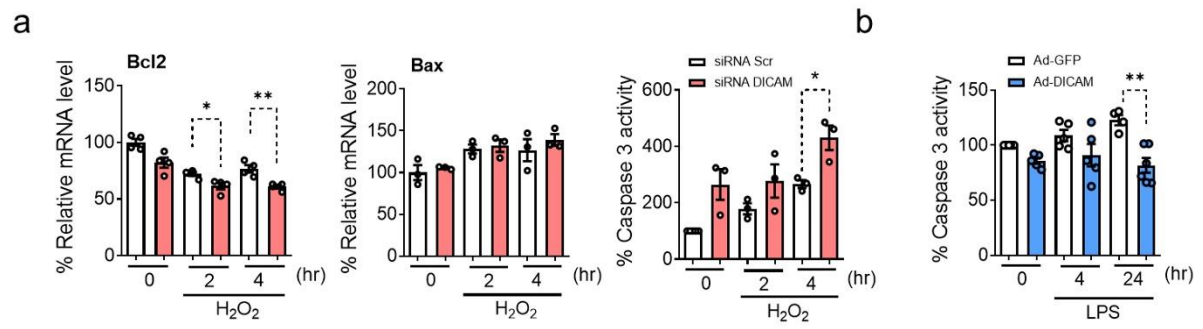

\*  $p < 0.05$ , \*\*  $p < 0.01$  indicate statistical significance.
